# Supplementary material for: Comparison of lipid and lipid-associated cardiovascular risk marker changes after treatment with tocilizumab or adalimumab in patients with rheumatoid arthritis
Source: PubMed Central journal article supplement — Ann Rheum Dis. 2015 Nov 27;75(10):1806–12. doi: 10.1136/annrheumdis-2015-207872 (PMC5036214; doi:10.1136/annrheumdis-2015-207872), 2015-11-27
Supplement: annrheumdis-2015-207872-s1.pdf [file annrheumdis-2015-207872-s1.pdf]

## Supplementary Table S1

**Supplementary Table S1.** Baseline demographics and disease characteristics of the ADACTA safety and bio-repository populations

|                                                                           | Safety population<br>N = 324 |                                | Bio-repository population<br>N = 184 |                               |
|---------------------------------------------------------------------------|------------------------------|--------------------------------|--------------------------------------|-------------------------------|
|                                                                           | ADA 40 mg SC<br>q2w<br>n=162 | TCZ 8 mg/kg IV<br>q4w<br>n=162 | ADA 40 mg SC<br>q2w<br>n=97          | TCZ 8 mg/kg IV<br>q4w<br>n=87 |
| Female, n (%)                                                             | 133 (82)                     | 129 (80)                       | 75 (77)                              | 69 (79)                       |
| Age, years                                                                | 53.3 (12.43)                 | 54.3 (12.94)                   | 54.3 (12.61)                         | 53.4 (12.94)                  |
| Weight, kg                                                                | 78.5 (19.64)                 | 76.0 (17.39)                   | 79.2 (18.64)                         | 77.8 (18.04)                  |
| Ethnicity, n (%)                                                          |                              |                                |                                      |                               |
| Hispanic                                                                  | 31 (19)                      | 20 (12)                        | 19 (20)                              | 9 (10)                        |
| Non-Hispanic                                                              | 131 (81)                     | 142 (88)                       | 78 (80)                              | 78 (90)                       |
| Geographic region                                                         |                              |                                |                                      |                               |
| North America                                                             | 59 (36)                      | 62 (38)                        | 33 (34)                              | 39 (45)                       |
| Non-North America                                                         | 103 (64)                     | 100 (62)                       | 64 (66)                              | 48 (55)                       |
| Duration of RA, years                                                     | 6.3 (6.94)                   | 7.3 (8.06)                     | 6.7 (7.09)                           | 6.8 (7.80)                    |
| RF positive, n (%)                                                        | 119 (73)                     | 121 (75)                       | 68 (70)                              | 59 (68)                       |
| Anti-CCP positive, n (%)                                                  | 117 (72)                     | 126 (78)                       | 67 (69)                              | 61 (70)                       |
| Number of previous DMARDs                                                 | 2.0 (1.06)                   | 2.0 (1.06)                     | 2.0 (1.11)                           | 2.0 (1.13)                    |
| Oral corticosteroid use, n (%)                                            | 92 (57)                      | 89 (55)                        | 49 (51)                              | 42 (48)                       |
| Previous and concomitant use of lipid-lowering agents, n (%) <sup>a</sup> | 35 (22)                      | 38 (23)                        | 17 (18%)                             | 11(13%)                       |
| TJC (68 joints)                                                           | 30.5 (16.71)                 | 29.3 (15.01)                   | 29.5 (17.12)                         | 27.7 (14.38)                  |
| SJC (66 joints)                                                           | 17.6 (10.80)                 | 16.1 (10.52)                   | 16.8 (10.14)                         | 16.2 (11.01)                  |
| DAS28                                                                     | 6.8 (0.94)                   | 6.7 (0.93)                     | 6.8 (0.94)                           | 6.6 (0.87)                    |
| CRP, mg/dl                                                                | 2.5 (3.86)                   | 2.6 (3.08)                     | 2.5 (4.11)                           | 2.5 (3.16)                    |
| ESR, mm/h                                                                 | 45.5 (25.35)                 | 50.6 (29.10)                   | 45.7 (23.28)                         | 46.7 (28.72)                  |

Data are mean (SD) unless stated otherwise.

<sup>a</sup>Total patients with at least one treatment.

CCP, cyclic citrullinated peptide; CRP, C-reactive protein; DAS28, Disease Activity Score based on 28 joint count; DMARD, disease-modifying antirheumatic drug; ESR, erythrocyte sedimentation rate; NA, not available; RA, rheumatoid arthritis; RF, rheumatoid factor; SJC, swollen joint count; TJC, tender joint count.
